# Supplementary material
Source: ML conference proceedings conference paper supplement (https://aclanthology.org/2024.semeval-1.244)

## (a) Simple History-Based Model

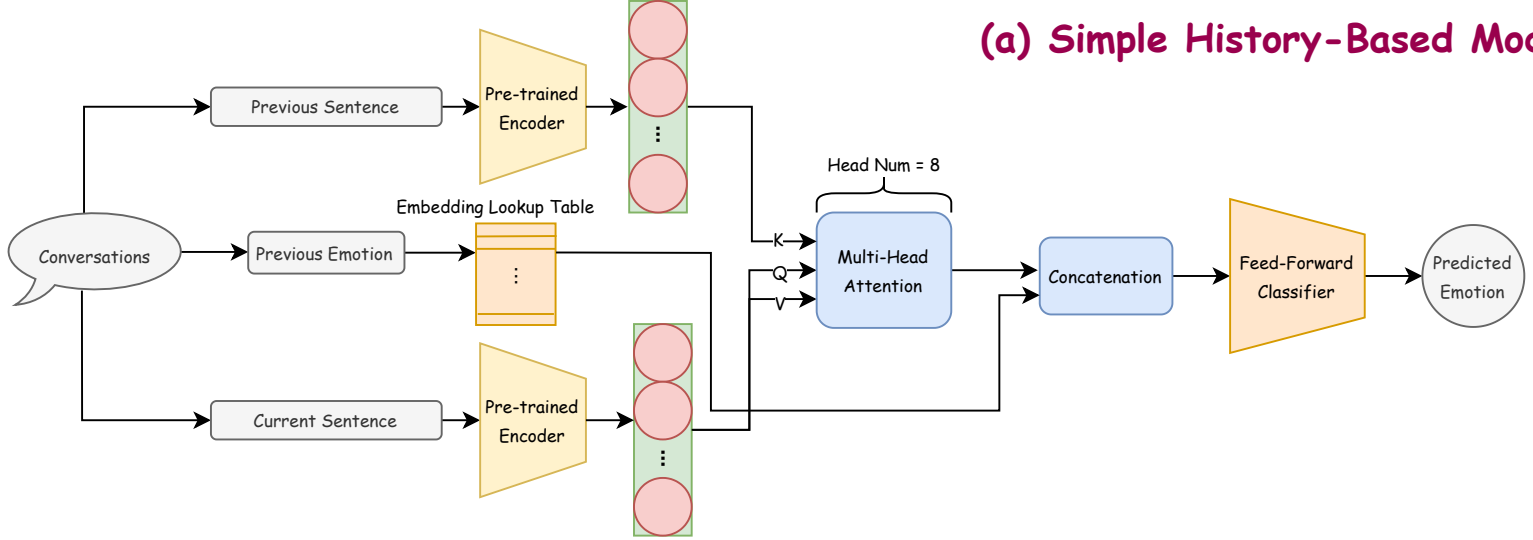

## (b) Full History-Based Model

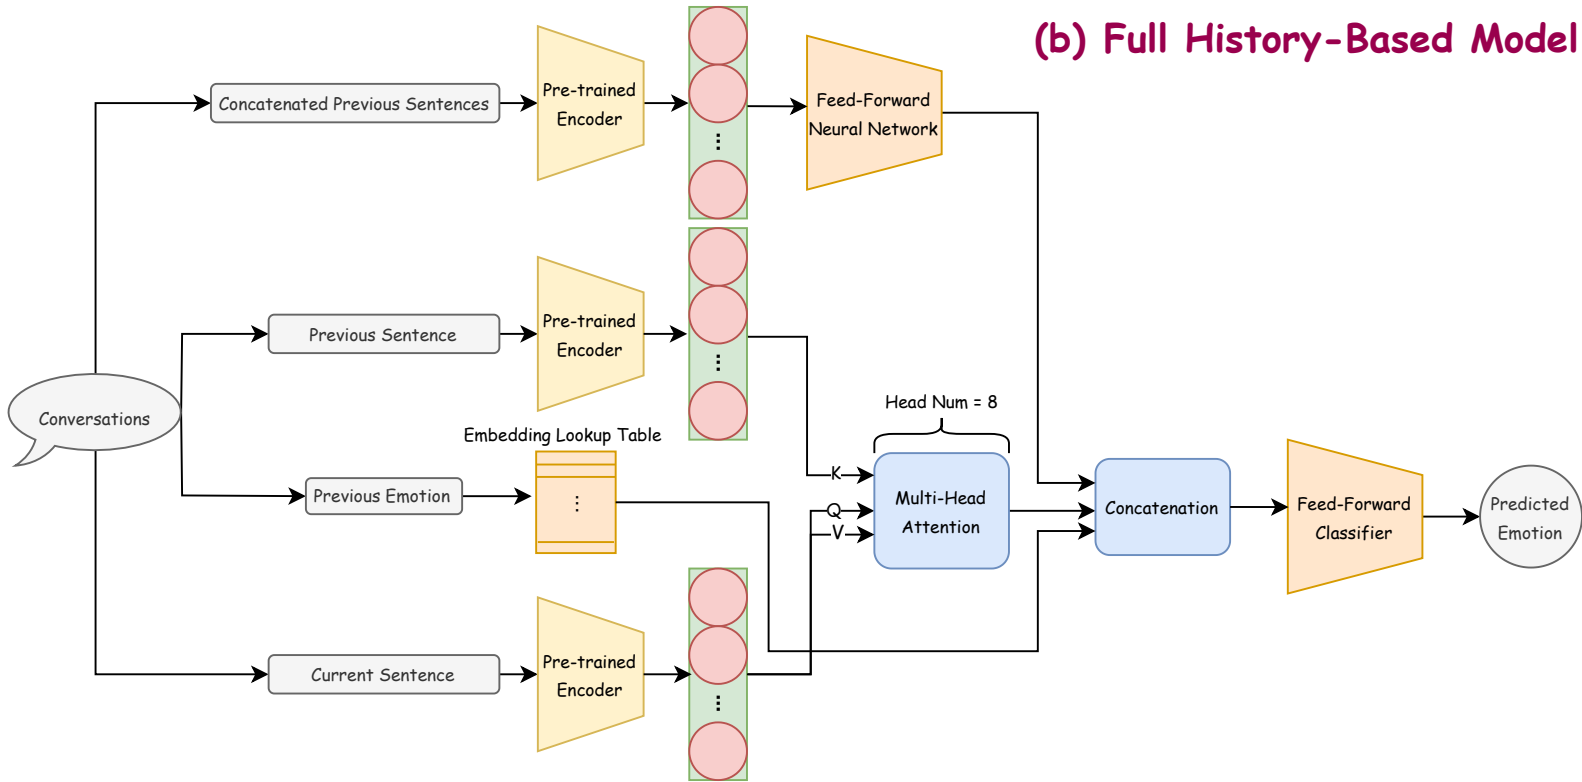

## (c) Context-Aware GRU-Based Model

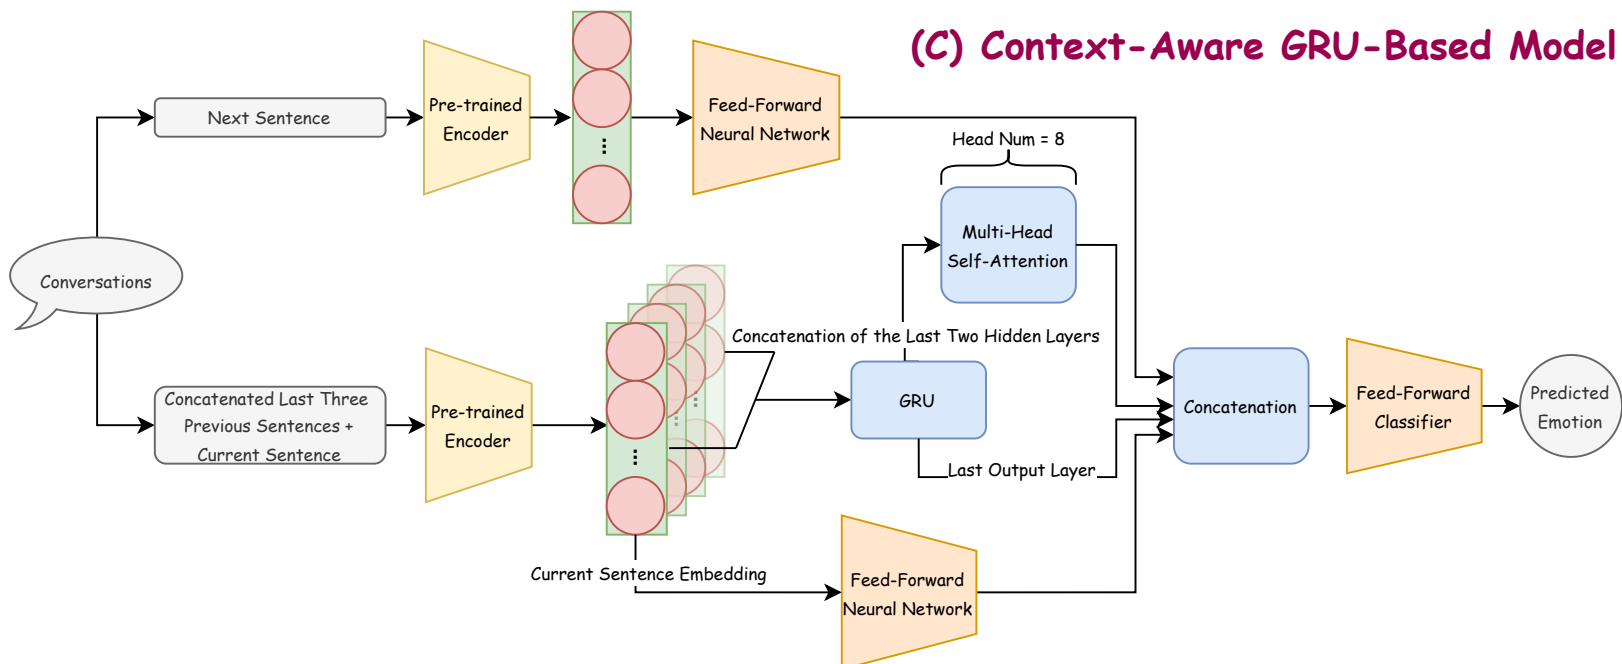

Supplement: SupplementaryMaterial [file 2024.semeval-1.244.SupplementaryMaterial.zip]

## (a) Simple History-Based Model



## (b) Full History-Based Model



## (c) Context-Aware GRU-Based Model

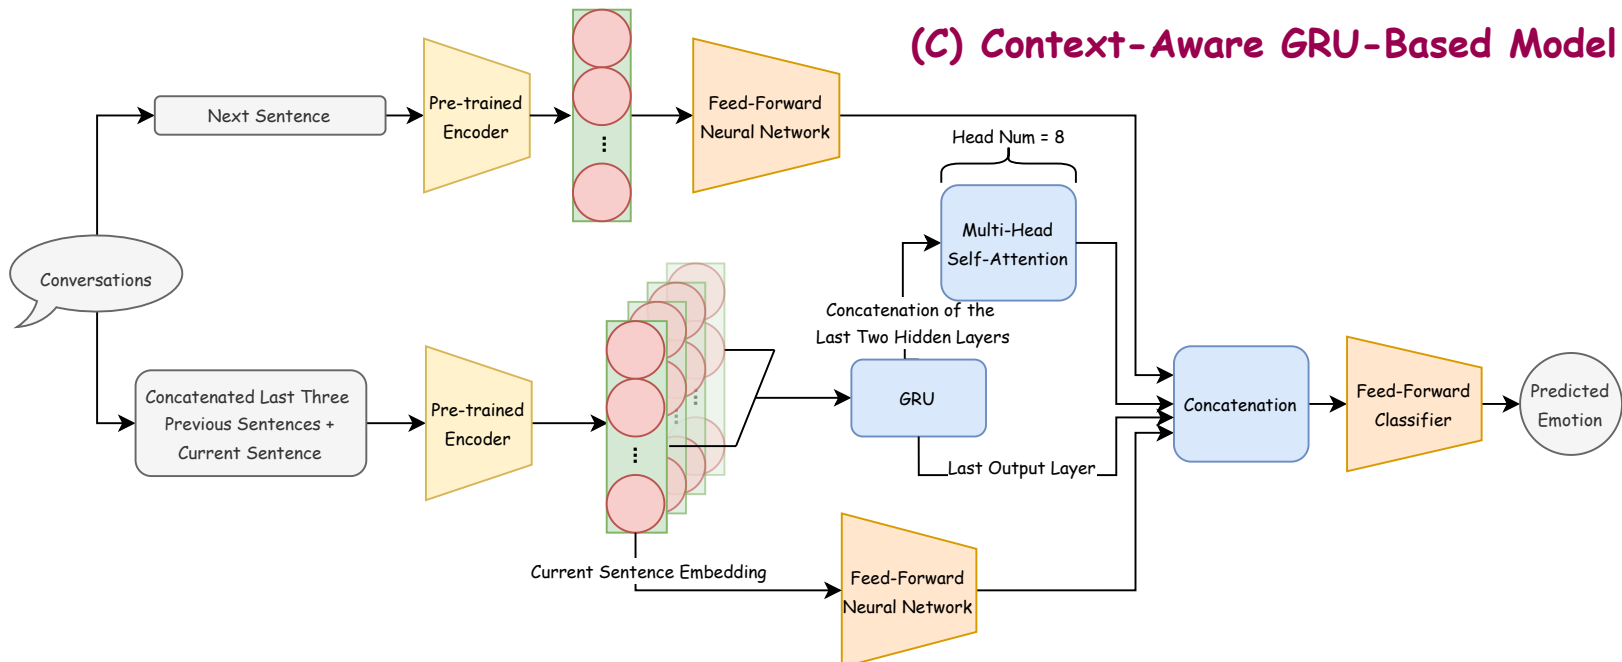

Supplement: SupplementaryMaterial [file 2024.semeval-1.244.SupplementaryMaterial.zip]

**(a) Simple History-Based Model**

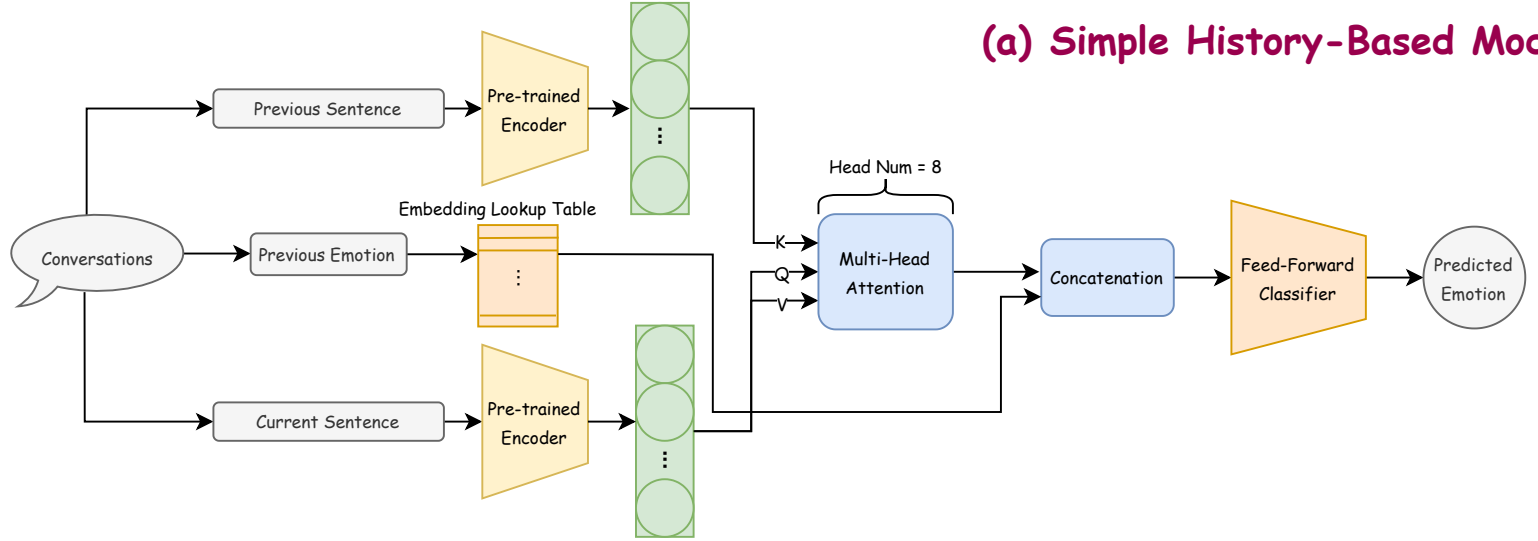

**(b) Full History-Based Model**

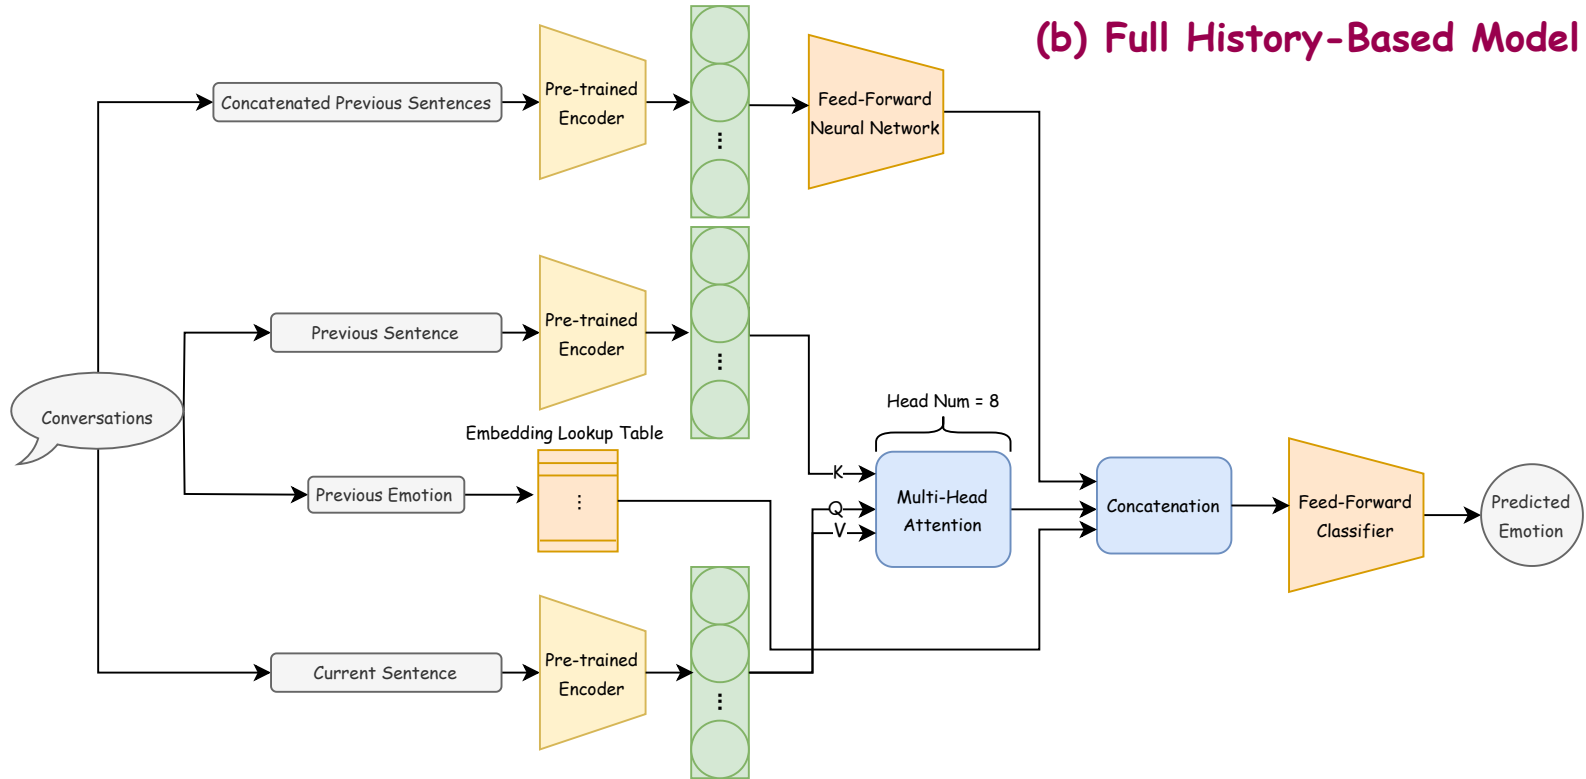

**(c) Context-Aware GRU-Based Model**

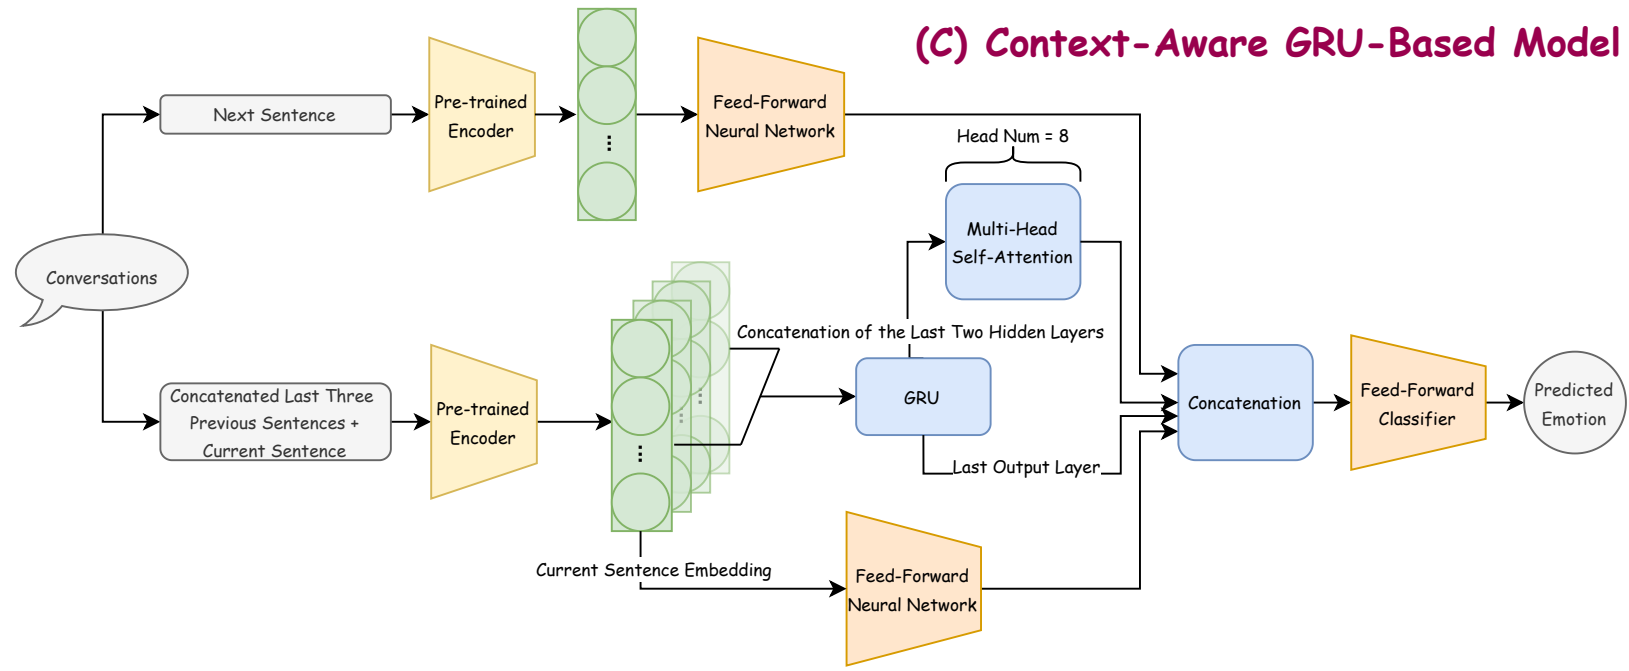

Supplement: SupplementaryMaterial [file 2024.semeval-1.244.SupplementaryMaterial.zip]
